# Supplementary material for: Nanobubble formation on a warmer substrate
Source: Royal Society of Chemistry journal article supplement (doi:10.1039/c4sm01025f), 2014-01-01
Supplement: c4sm01025f1.pdf [file c4sm01025f1.pdf]

## Supporting Information

### Nanobubble formation on a warmer substrate

Chenglong Xu<sup>1</sup>, Shuhua Peng<sup>1,2</sup>, Greg G. Qiao<sup>1</sup>, Voytek Gutowski<sup>3</sup>, Detlef Lohse<sup>4</sup> and  
Xuehua Zhang<sup>1,2\*</sup>

<sup>1</sup> Department of Chemical and Biomolecular Engineering, University of Melbourne, Parkville,  
VIC 3010, Australia.

<sup>2</sup> School of Chemistry, University of Melbourne, Parkville, VIC 3010, Australia.

<sup>3</sup> Materials Science and Engineering, CSIRO, Highett, Victoria 3190, Australia.

<sup>4</sup> Physics of Fluids Group, Department of Science & Technology, Mesa+ Institute, and J. M.  
Burgers Centre for Fluid Dynamics, University of Twente, 7500 AE Enschede, The  
Netherlands.

**Table S1.** Oxygen level in water with different history. The dissolved oxygen level in water measured by optic fiber oxygen sensor (Ocean Optics, USA).

| Initial condition                       | 20 min at 34°C | 10 hrs at 34°C | Shaking by hand |
|-----------------------------------------|----------------|----------------|-----------------|
| Fresh Milli-Q water at room-temperature | 24%            | 26%            | 24%             |
| Milli-Q water in 4 °C for 12 hrs        | 32%            | 29%            | 25%             |

**Figure S2.** Cosine contact angle versus the inverse of base radius  $R_b$  of nanobubbles produced at different temperature. The solid lines are the linear fittings of the data. The standard error of the linear fitting for the slope is 1.26 at 37°C, 1.65 at 42°C, 0.56 at 51°C, and 0.82 at 54°C. The line tension derived from the slope of the linear lines according to the Eq. 2 in the main text is listed in Table S2 .

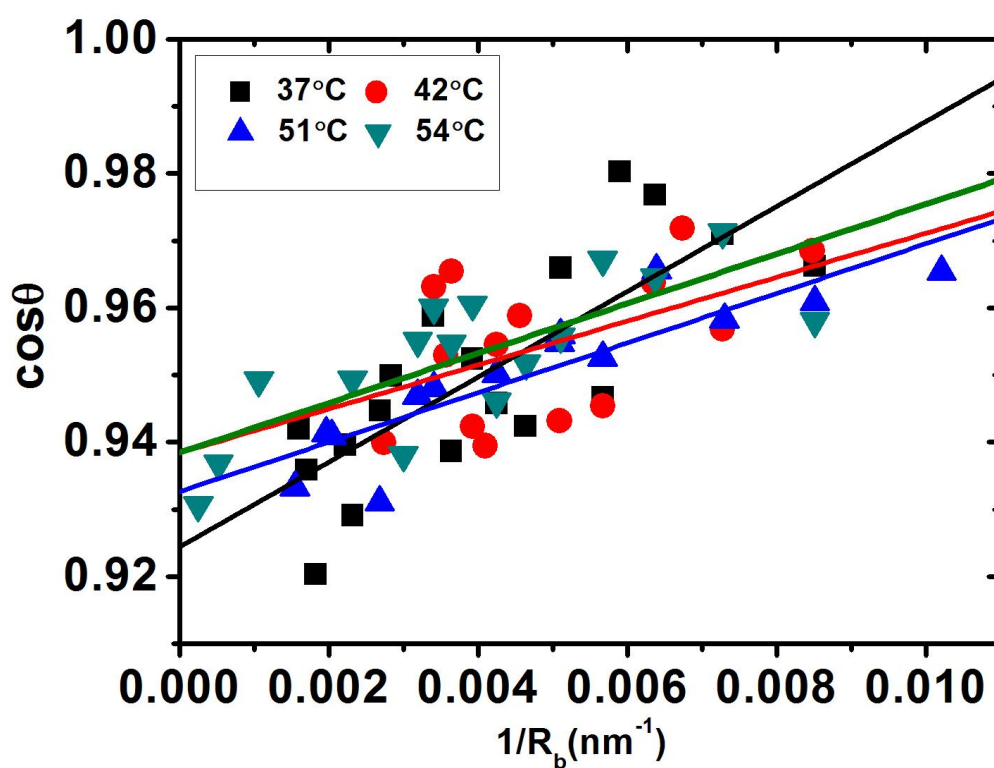

**Figure S3.** Spreading parameters and the fitting constant  $\delta r$  derived from the intercept and slope of the linear lines according to the Eq. 3 in the main text is listed in Table S2. The standard errors of the intercept and slope fitting are 0.01 and 2.98 at 37°C, 0.02 and 3.68 at 42°C, 0.01 and 1.06 at 51°C, 0.01 and 1.76 at 54°C, respectively.

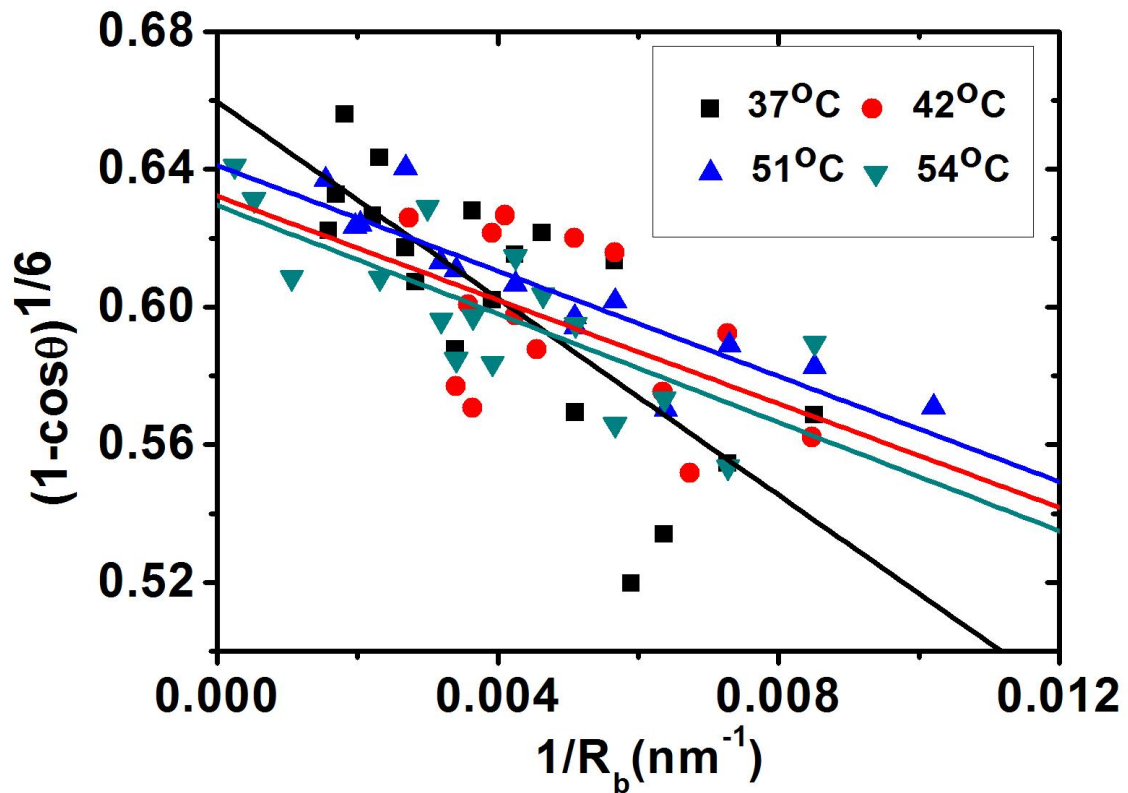

**Table S2.** Fitting parameters for the dependence of the contact angles of nanobubbles with their lateral sizes.

| Temperature (°C) | $\theta_{\infty}$ (°) | $\tau/\gamma_{LV}$ (nm) | $-S/\gamma$ | $\delta r$ (nm) |
|------------------|-----------------------|-------------------------|-------------|-----------------|
| 37               | 22.4                  | 6.3                     | 0.0824      | 21.6            |
| 42               | 20.2                  | 3.3                     | 0.0639      | 11.9            |
| 51               | 21.1                  | 3.7                     | 0.0695      | 11.9            |
| 54               | 20.2                  | 3.7                     | 0.0622      | 12.5            |
